# Supplementary material
Source: ML conference proceedings conference paper supplement (https://openaccess.thecvf.com/content/WACV2025/html/Cavalcanti_CabNIR_A_Benchmark_WACV_2025_paper.html)
Supplement: Supplementary file 1 [file Cavalcanti_CabNIR_A_Benchmark_WACV_2025_supplemental.pdf]

# Supplementary Materials for CabNIR: A Benchmark for In-Vehicle Infrared Monocular Depth Estimation

Ugo Leone Cavalcanti<sup>1</sup>  
Valerio Cambareri<sup>2</sup>

Matteo Poggi<sup>1</sup>  
Vladimir Zlokolica<sup>2</sup>

Fabio Tosi<sup>1</sup>  
Stefano Mattoccia<sup>1</sup>

<sup>1</sup>Department of Computer Science and Engineering, University of Bologna, Italy

<sup>2</sup>Sony Depthsensing Solutions, Brussels, Belgium

Project page: <https://cabnir.github.io/>

## 1. Responsibility to Human Subjects

Since our dataset aims at in-cabin monitoring, it necessarily features the presence of people whose faces are visible. Indeed, although faces represent Personally Identifiable Information (PII), we cannot hide or blur these details to avoid altering the depth estimation process. As such, all the subjects involved in our acquisitions have been made perfectly aware of the information stored (NIR images and depth maps) and purposes. Each participant agreed to sign an explicit consent form.

Furthermore, our dataset has been approved by our institution’s Institutional Review Board (IRB). According to the IRB guidance, CabNIR will be available only to registered users: they shall provide a short overview of their research goal and use the data only for scientific purposes, targeting in-cabin monitoring through depth estimation.

## 2. Data Description

In this section, we describe how the dataset is structured (2.1) and the car models used for data acquisition (2.2).

### 2.1. Naming and Structure

We now describe how file names and the directory tree are constructed. Frames related to each recording session are contained in a directory named as the following scheme:

[model\_name] - [version] - [sequence] - [Day|Night]

- [model\_name] is the car model.
- [version] is an identification letter used to distinguish between different version of the same car model.
- [sequence] is a progressive number to identify distinct recordings of the same cabin (e.g. a different passengers configuration).
- [Day|Night] indicates whether the recording session has been done in daytime or at night.

### 2.2. Recordings

The dataset comprises 47 scenes featuring 45 people and 36 different cabins. The complete list of the models we employed is in Tab. 1. In some of the scenes we used different version of the same model - e.g. a diverse upholstery, interior configuration or accessories. The use of different versions is denoted by the [version\_ID] letter. However, there is also a collection of scenes made with the same cabin, this is indicated by the same [version\_ID] letter and a different [sequence\_ID] number. As an example: in Yaris\_A.1\_Night and Yaris\_A.2\_Night we have the same cabin and camera pose, but in the first sequence the driver is with a passenger, while in the second sequence he is alone.

| Sequence Name    | Model             | # of Seats | Ceiling      | Front            | Back        | Camera Pose | Everyday Objs |
|------------------|-------------------|------------|--------------|------------------|-------------|-------------|---------------|
| 500.A.1.Night    | Fiat 500          | 4          | Glass        | Driver Alone     | 1 Passenger | Low         | ✓             |
| 500.B.1.Day      | Fiat 500          | 4          | Soft Top     | Driver+Passenger | Empty       | High        | ✓             |
| 500.C.1.Night    | Fiat 500          | 4          | Soft Top     | Driver+Passenger | Empty       | High        | ✓             |
| 500.D.1.Night    | Fiat 500          | 4          | Hard Top     | Driver Alone     | Empty       | High        | ✗             |
| A1.A.1.Day       | Audi A1           | 5          | Hard Top     | Driver Alone     | Empty       | High        | ✓             |
| A3.A.1.Day       | Audi A3           | 5          | Hard Top     | Driver Alone     | Empty       | High        | ✗             |
| A3.A.2.Day       | Audi A3           | 5          | Hard Top     | Driver+Passenger | Empty       | Low         | ✓             |
| A3.B.1.Night     | Audi A3           | 5          | Hard Top     | Driver Alone     | Empty       | High        | ✗             |
| Beetle.A.1.Day   | Volkswagen Beetle | 4          | Soft Top     | Driver+Passenger | Empty       | Low         | ✓             |
| Beetle.A.2.Day   | Volkswagen Beetle | 4          | Soft Top     | Driver+Passenger | 2 Passenger | Low         | ✓             |
| Beetle.A.3.Day   | Volkswagen Beetle | 4          | Soft Top     | Driver Alone     | 1 Passenger | Low         | ✓             |
| C3.A.1.Night     | Citroen C3        | 5          | Glass+Fabric | Driver+Passenger | 1 Passenger | Low         | ✗             |
| C3.A.2.Night     | Citroen C3        | 5          | Glass+Fabric | Driver+Passenger | Empty       | Low         | ✗             |
| CLA.A.1.Day      | Mercedes CLA      | 5          | Hard Top     | Driver+Passenger | Empty       | Low         | ✗             |
| Empty            | Fiat 500          | 4          | Soft Top     | Empty            | Empty       | High        | ✓             |
| Fortwo.A.1.Night | Smart Fortwo      | 2          | Soft Top     | Driver Alone     | -           | Low         | ✗             |
| Fortwo.B.1.Night | Smart Forwo       | 2          | Glass        | Driver+Passenger | -           | High        | ✓             |
| Fortwo.C.1.Night | Smart Forwo       | 2          | Hard Top     | Driver+Passenger | -           | Low         | ✓             |
| GX3.A.1.Day      | Mazda GX3         | 5          | Hard Top     | Driver Alone     | Empty       | Low         | ✓             |
| Golf.A.1.Night   | Volkswagen Golf   | 5          | Galss        | Driver+Passenger | Empty       | Low         | ✓             |
| Ibiza.A.1.Day    | Seat Ibiza        | 5          | Hard Top     | Driver+Passenger | 1 Passenger | Low         | ✓             |
| Jimny.A.1.Day    | Suzuki Jimny      | 3          | Hard Top     | Driver+Passenger | Empty       | High        | ✗             |
| Mito.A.1.Day     | Alfa Romeo Mito   | 4          | Hard Top     | Driver+Passenger | Empty       | Low         | ✓             |
| Model3.A.1.Night | Tesla Model 3     | 5          | Glass        | Driver           | Empty       | Low         | ✓             |
| Model3.A.2.Night | Tesla Model 3     | 5          | Glass        | Driver+Passenger | Empty       | Low         | ✓             |
| Panda.A.1.Day    | Fiat Panda        | 4          | Hard Top     | Driver+Passenger | Empty       | High        | ✗             |
| Panda.B.1.Day    | Fiat Panda        | 5          | Hard Top     | Driver Alone     | Empty       | High        | ✗             |
| Panda.C.1.Night  | Fiat Panda        | 5          | Hard Top     | Driver Alone     | Empty       | Low         | ✗             |
| Panda.D.1.Day    | Fiat Panda        | 4          | Hard Top     | Driver Alone     | Empty       | Low         | ✗             |
| Panda.E.1.Night  | Fiat Panda        | 5          | Hard Top     | Driver+Passenger | Empty       | Low         | ✗             |
| Panda.E.2.Night  | Fiat Panda        | 5          | Hard Top     | Driver Alone     | Empty       | Low         | ✗             |
| Panda.F.1.Night  | Fiat Panda        | 5          | Hard Top     | Driver+Passenger | Empty       | Low         | ✗             |
| Panda.F.2.Night  | Fiat Panda        | 5          | Hard Top     | Driver+Passenger | 1 Passenger | Low         | ✗             |
| Polo.A.1.Night   | Volkswagen Polo   | 5          | Hard Top     | Driver Alone     | Empty       | High        | ✓             |
| Puma.A.1.Night   | Ford Puma         | 5          | Hard Top     | Driver Alone     | Empty       | Low         | ✓             |
| RS3.A.1.Night    | Audi RS3          | 5          | Glass        | Driver+Passenger | 1 Passenger | High        | ✗             |
| Up.A.1.Day       | Volkswagen Up     | 4          | Hard Top     | Driver Alone     | Empty       | High        | ✗             |
| Up.B.1.Night     | Volkswagen Up     | 4          | Hard Top     | Driver+Passenger | Empty       | Low         | ✗             |
| V60.A.1.Night    | Volvo V60         | 5          | Hard Top     | Driver Alone     | Empty       | Low         | ✗             |
| X2.A.1.Night     | BMW X2            | 5          | Hard Top     | Driver Alone     | Empty       | Low         | ✓             |
| Yaris.A.1.Night  | Toyota Yaris      | 5          | Hard Top     | Driver+Passenger | Empty       | Low         | ✓             |
| Yaris.A.2.Night  | Toyota Yaris      | 5          | Hard Top     | Driver Alone     | Empty       | Low         | ✓             |
| Yaris.B.1.Night  | Toyota Yaris      | 5          | Hard Top     | Driver Alone     | Empty       | High        | ✗             |
| Yaris.C.1.Night  | Toyota Yaris      | 5          | Hard Top     | Driver Alone     | Empty       | Low         | ✗             |
| Yaris.D.1.Night  | Toyota Yaris      | 5          | Hard Top     | Driver Alone     | Empty       | Low         | ✗             |
| Yaris.E.1.Day    | Toyota Yaris      | 5          | Hard Top     | Driver+Passenger | Empty       | Low         | ✓             |
| Yaris.E.2.Day    | Toyota Yaris      | 5          | Hard Top     | Driver+Passenger | 1 Passenger | Low         | ✓             |

Table 1. CabNIR-Sequences Description

| Model              | Validation Split |              |              |                   |                   |                   | Test Split   |              |              |                   |                   |                   |
|--------------------|------------------|--------------|--------------|-------------------|-------------------|-------------------|--------------|--------------|--------------|-------------------|-------------------|-------------------|
|                    | AbsRel↓          | RMSE↓        | MAE↓         | $\delta_{1.10}$ ↑ | $\delta_{1.20}$ ↑ | $\delta_{1.30}$ ↑ | AbsRel↓      | RMSE↓        | MAE↓         | $\delta_{1.10}$ ↑ | $\delta_{1.20}$ ↑ | $\delta_{1.30}$ ↑ |
| MiDaS [4]          | 0.435            | 0.234        | 0.171        | 0.227             | 0.433             | 0.587             | 0.383        | 0.205        | 0.154        | 0.247             | 0.442             | 0.572             |
| LeReS [6]          | 0.507            | 0.289        | 0.217        | 0.180             | 0.332             | 0.455             | 0.432        | 0.237        | 0.165        | 0.253             | 0.451             | 0.584             |
| DPT [3]            | <b>0.291</b>     | <b>0.164</b> | <b>0.128</b> | <b>0.268</b>      | <b>0.480</b>      | <b>0.642</b>      | <b>0.272</b> | <b>0.149</b> | <b>0.115</b> | <b>0.278</b>      | <b>0.508</b>      | <b>0.682</b>      |
| OmniData [1]       | 0.370            | 0.227        | 0.169        | 0.208             | 0.406             | 0.564             | 0.455        | 0.233        | 0.178        | 0.187             | 0.358             | 0.506             |
| Depth Anything [5] | 0.312            | 0.187        | 0.143        | 0.228             | 0.462             | 0.633             | 0.329        | 0.178        | 0.133        | 0.251             | 0.500             | 0.654             |

Table 2. Zero-shot affine-invariant networks. We report the results achieved by several existing networks trained on large-scale datasets. Results on validation (left) and test (right) splits.

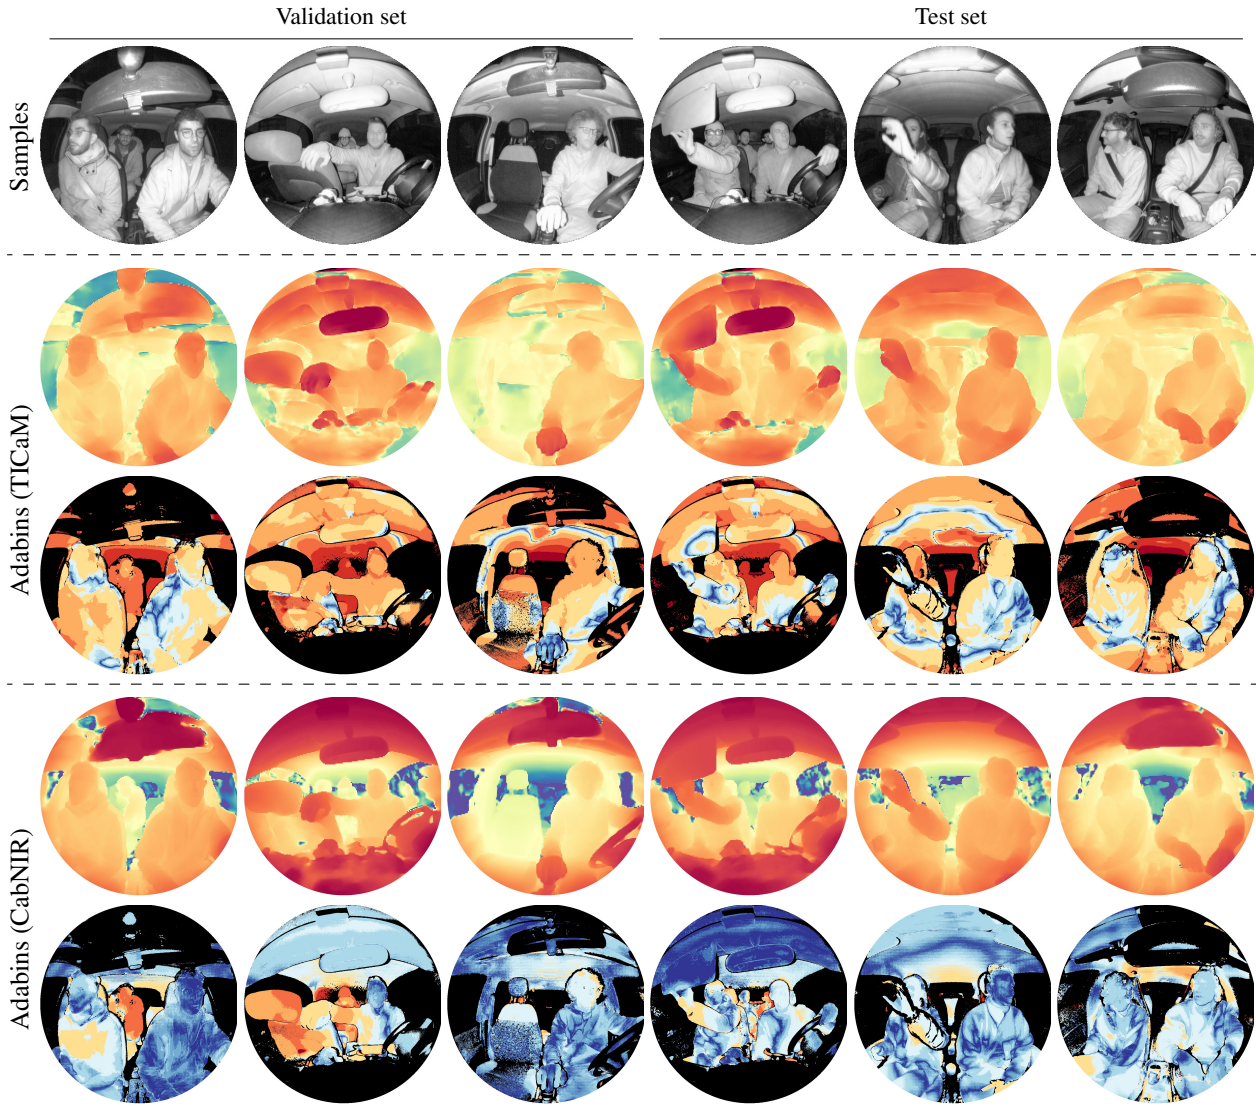

Figure 1. **Qualitative results on CabNIR validation and test split – Adabins.** Predictions and error maps by models trained on TICaM [2] or our training set.

### 3. Zero-Shot Results

Tab. 2 shows the results achieved by running the pre-trained models – MiDaS [4], LeReS [6], DPT [3] and OmniData [1] and Depth Anything [5] – directly on CabNIR without any fine-tuning. Despite being trained on millions of images, the networks fail to generalize to the very different setting features in our dataset, both in terms of image modality (NIR) and camera setting (wide-angle). Among the evaluated models, DPT demonstrates better generalization to our domain, achieving an average error close to 10cm.

### 4. Qualitative Results

We conclude by reporting some qualitative results. Fig. 1 shows a comparison between the predictions by Adabins trained on TICaM and CabNIR respectively. Despite the better results yielded by the latter, we can appreciate the high errors in the presence of rare conditions – e.g., the slanted seat in column 2, or the raised hand in column 7. Fig. 2 concludes this experiment by qualitatively comparing the original and fine-tuned DPT models. However, despite the significant improvement achieved with the fine-tuning, DPT still fails in the presence of the slanted seat in column 2.

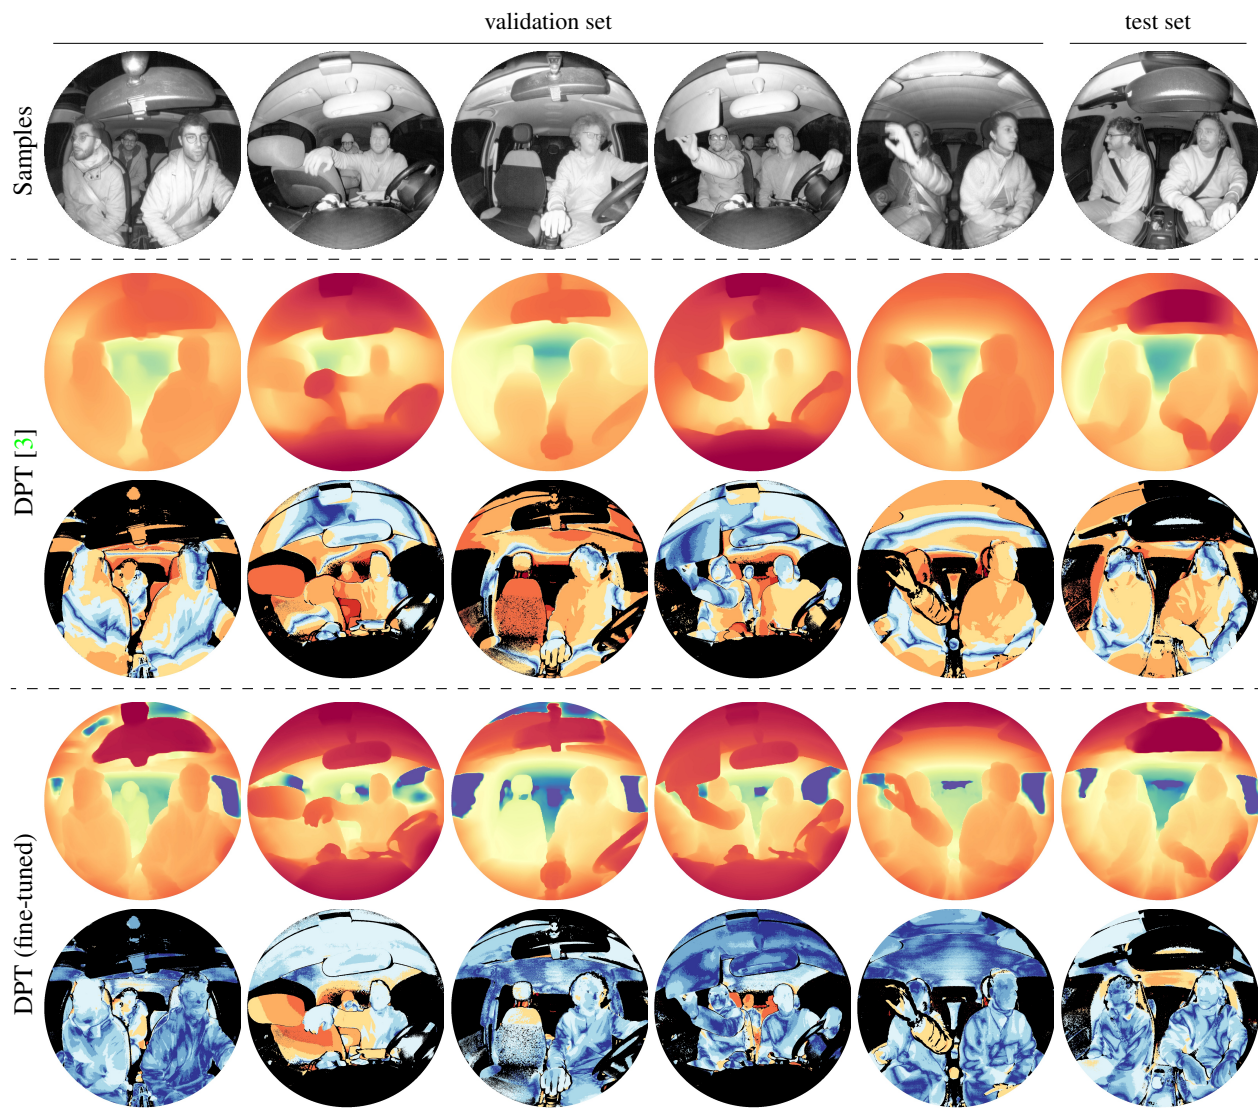

Figure 2. Qualitative results on CabNIR validation and test split – DPT. Predictions and error maps by the original model or the one fine-tuned on our training set.

## References

- [1] Ainaz Eftekhari, Alexander Sax, Jitendra Malik, and Amir Zamir. Omnidata: A scalable pipeline for making multi-task mid-level vision datasets from 3d scans. In *Proceedings of the IEEE/CVF International Conference on Computer Vision*, pages 10786–10796, 2021. 2, 3
- [2] Jigyasa Singh Katroliya, Ahmed El-Sherif, Hartmut Feld, Bruno Mirbach, Jason R. Rambach, and Didier Stricker. Ticam: A time-of-flight in-car cabin monitoring dataset. In *32nd British Machine Vision Conference 2021, BMVC 2021, Online, November 22-25, 2021*, page 277. BMVA Press, 2021. 3
- [3] René Ranftl, Alexey Bochkovskiy, and Vladlen Koltun. Vision transformers for dense prediction. *ICCV*, 2021. 2, 3, 4
- [4] René Ranftl, Katrin Lasinger, David Hafner, Konrad Schindler, and Vladlen Koltun. Towards robust monocular depth estimation: Mixing datasets for zero-shot cross-dataset transfer. *IEEE Transactions on Pattern Analysis and Machine Intelligence*, 44(3), 2022. 2, 3
- [5] Lihe Yang, Bingyi Kang, Zilong Huang, Xiaogang Xu, Jiashi Feng, and Hengshuang Zhao. Depth anything: Unleashing the power of large-scale unlabeled data. In *Proceedings of the IEEE/CVF Conference on Computer Vision and Pattern Recognition*, pages 10371–10381, 2024. 2, 3
- [6] Wei Yin, Jianming Zhang, Oliver Wang, Simon Niklaus, Long Mai, Simon Chen, and Chunhua Shen. Learning to recover 3d scene shape from a single image. In *Proceedings of the IEEE/CVF Conference on Computer Vision and Pattern Recognition*, pages 204–213, 2021. 2, 3
